# Supplementary material
Source: Elsevier journal article supplement (https://www.sciencedirect.com/science/article/pii/S0009739X19303458)
Supplement: mmc1 [file S0009739X19303458:mmc1.docx]

| Medida | Recomendación |
| --- | --- |
| Eliminación del vello cutáneo | Se recomienda no retirar de forma rutinaria el vello del campo quirúrgico.  En caso de considerarse necesario, se debe eliminar fuera del área quirúrgica, poco tiempo antes del inicio de la intervención y mediante corte con maquinilla eléctrica. |
| Antisepsia de la piel | En piel indemne se recomienda descontaminar la piel con una solución alcohólica, con gluconato de clorhexidina al 2% con 70% de alcohol o povidona yodada al 5% en 70% de alcohol, en cantidad y extensión adecuadas.  En mucosas o piel con heridas abiertas, se recomienda un antiséptico de base acuosa con clorhexidina al 2% o con povidona yodada al 10%.  Se recomienda que todos los antisépticos actúen sobre la piel al menos durante 3 minutos y se dejen secar al aire por completo antes de colocar la cobertura quirúrgica.  Cuando se utilicen soluciones alcohólicas, se recomienda extremar las medidas de seguridad para evitar el riesgo de incendios y quemaduras. |
| Profilaxis antibiótica adecuada | Se recomienda la profilaxis antibiótica sistémica adecuada, en general en monodosis.  Se recomiendan redosificaciones que proporcionen niveles terapéuticos óptimos durante toda la intervención. |
| Prolongación de la profilaxis antibiótica | Se recomienda no prolongar la profilaxis antibiótica más de 24 horas. |
| Normotermia | Se recomienda mantener la temperatura central del paciente por encima de 36ºC durante todo el periodo perioperatorio en todos los procedimientos de >30 minutos de duración. |
| Normoglucemia | Se recomienda el control no estricto de la glucemia perioperatoria en cirugía mayor en pacientes diabéticos y no diabéticos, con el objetivo de alcanzar niveles por debajo de 150-200 mg/dl (8,3 mmol/L - 11,1 mmol/L). |
| Baño/ducha preoperatorio | Se recomienda que el paciente se duche el mismo día de la intervención con un jabón de clorhexidina o con jabón no farmacológico, proporcionando la máxima información al paciente sobre el procedimiento a seguir. |
| Preparación/lavado de manos | Se recomienda que la primera higiene quirúrgica de manos del día sea con solución jabonosa antiséptica, de 5 minutos, y que incluya manos, antebrazos y codos.  Las ulteriores preparaciones quirúrgicas pueden ser con jabón antiséptico o con solución alcohólica, dejando que se evapore de la piel. |
| Protección de los márgenes de la herida quirúrgica | Se recomienda la utilización de protectores plásticos para proteger los márgenes de la herida quirúrgica, preferiblemente de doble anillo. |
| Profilaxis antibiótica vía oral en cirugía colorrectal | Se recomienda la profilaxis antibiótica por vía oral asociada a la preparación mecánica de colon en cirugía colorrectal. |
| Normovolemia | Se recomienda evitar la hipotensión perioperatoria y el exceso de volumen que produzca edema de los tejidos y una expansión significativa del volumen extracelular, situaciones que pueden interferir tanto en la cicatrización correcta de las anastomosis y suturas como en la biodisponibilidad correcta de los antibióticos profilácticos. |
| Ropa operatoria / campos quirúrgicos | Se recomienda el uso de mascarillas y gorros cubriendo el pelo, además de campos quirúrgicos y ropa operatoria estériles.  No se recomienda utilizar la vestimenta del área quirúrgica fuera de ella. |
| Apósitos protectores para las heridas quirúrgicas | Se recomienda aplicar un apósito con gasa estéril durante 48 horas sobre las heridas quirúrgicas. |
| Nutrición preoperatoria | Se recomienda la nutrición perioperatoria del paciente desnutrido.  Se sugiere la inmunonutrición preoperatoria en los pacientes desnutridos con cáncer que van a ser sometidos a cirugía mayor. |
| Preparación mecánica del colon | No se recomienda la preparación mecánica de colon aislada como medida de prevención de ILQ en cirugía colorrectal. |
| Suspensión del tratamiento inmunomodulador antes de la intervención | No se recomienda la retirada de la terapia inmunosupresora sistémica previa a la cirugía mayor. |
| Protectores de plástico adhesivo sobre el campo quirúrgico | No se recomienda utilizar protectores de plástico adhesivo sobre el campo quirúrgico. |
| Utilización de sellantes cutáneos | No se recomienda utilizar sellantes cutáneos sobre el campo quirúrgico. |
| Oxigenación | No se recomienda la hiperoxia durante el periodo perioperatorio. |
| Sistemas de ventilación con flujo laminar en quirófano | No se recomienda la instalación de sistemas de ventilación con flujo laminar en los quirófanos de cirugía general. |
| Uso de doble guante quirúrgico | Se sugiere la utilización de doble guante para aumentar la protección a la contaminación tanto de los pacientes al equipo quirúrgico como del equipo quirúrgico a los pacientes |
| Suturas con antiséptico | Se sugiere la utilización suturas impregnadas con antiséptico en cirugía limpia y limpia-contaminada, si se dispone de ellas sin un coste adicional. |
| Irrigación de la herida quirúrgica | Se sugiere la irrigación de las heridas al final de la intervención con una cantidad moderada de una solución a presión para eliminar detritus y cuerpos extraños. |
| Cambio del material quirúrgico | Se sugiere cambiar el instrumental quirúrgico y el material auxiliar (terminales de aspirador, bisturí eléctrico, mangos de las lámparas quirúrgicas) antes del cierre de las heridas en cirugía limpia-contaminada, contaminada y sucia. |
| Cambios de guantes | Se sugiere el cambio de guantes cuando se sospeche contaminación o perforación, al finalizar una anastomosis digestiva y, como rutina, en las operaciones de más de 2 horas, antes de colocar una prótesis y antes de cerrar la incisión. |
| Terapia de presión negativa | Se sugiere la terapia de presión negativa sobre la herida cerrada únicamente en cirugía con alto riesgo de infección. |
